# Supplementary material for: Multi-Omic Admission-Based Prognostic Biomarkers Identified by Machine Learning Algorithms Predict Patient Recovery and 30-Day Survival in Trauma Patients
Source: MDPI journal article supplement (doi:10.3390/metabo12090774), 2022-08-23
Supplement: s1 [file s1]

## Supplementary figures and tables

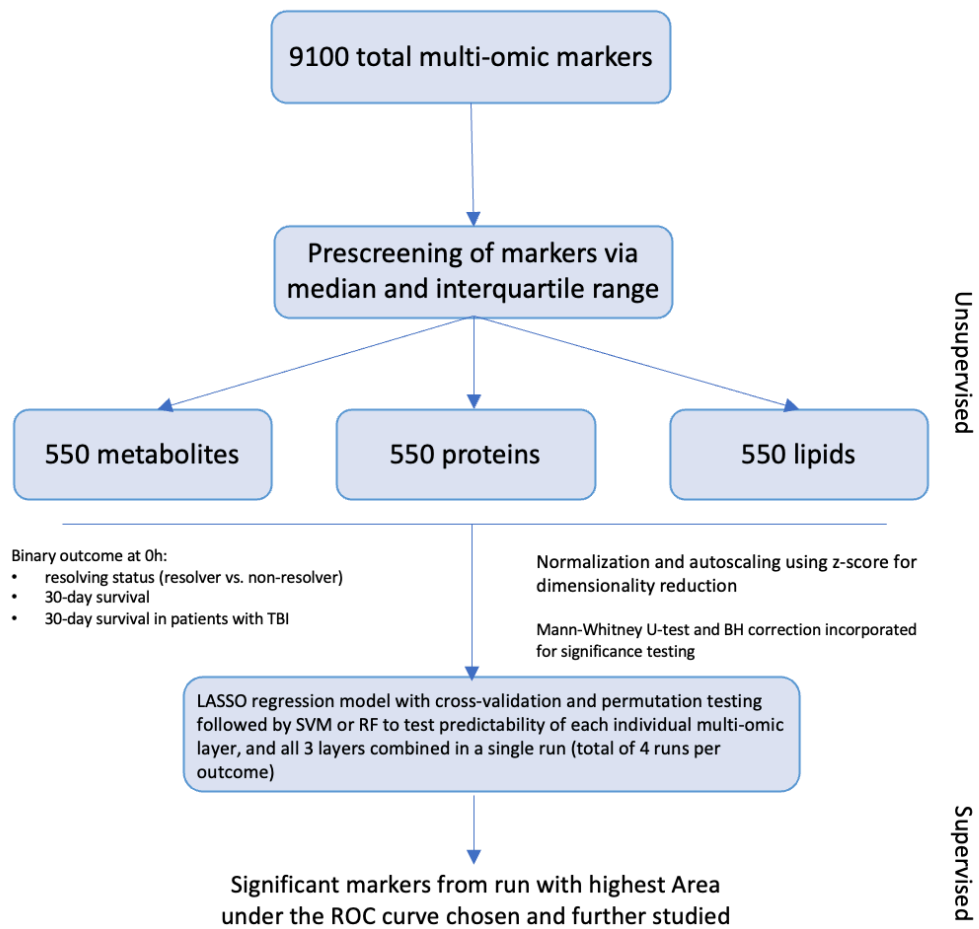

Figure S1 Flow chart of methods used for feature selection using LASSO.

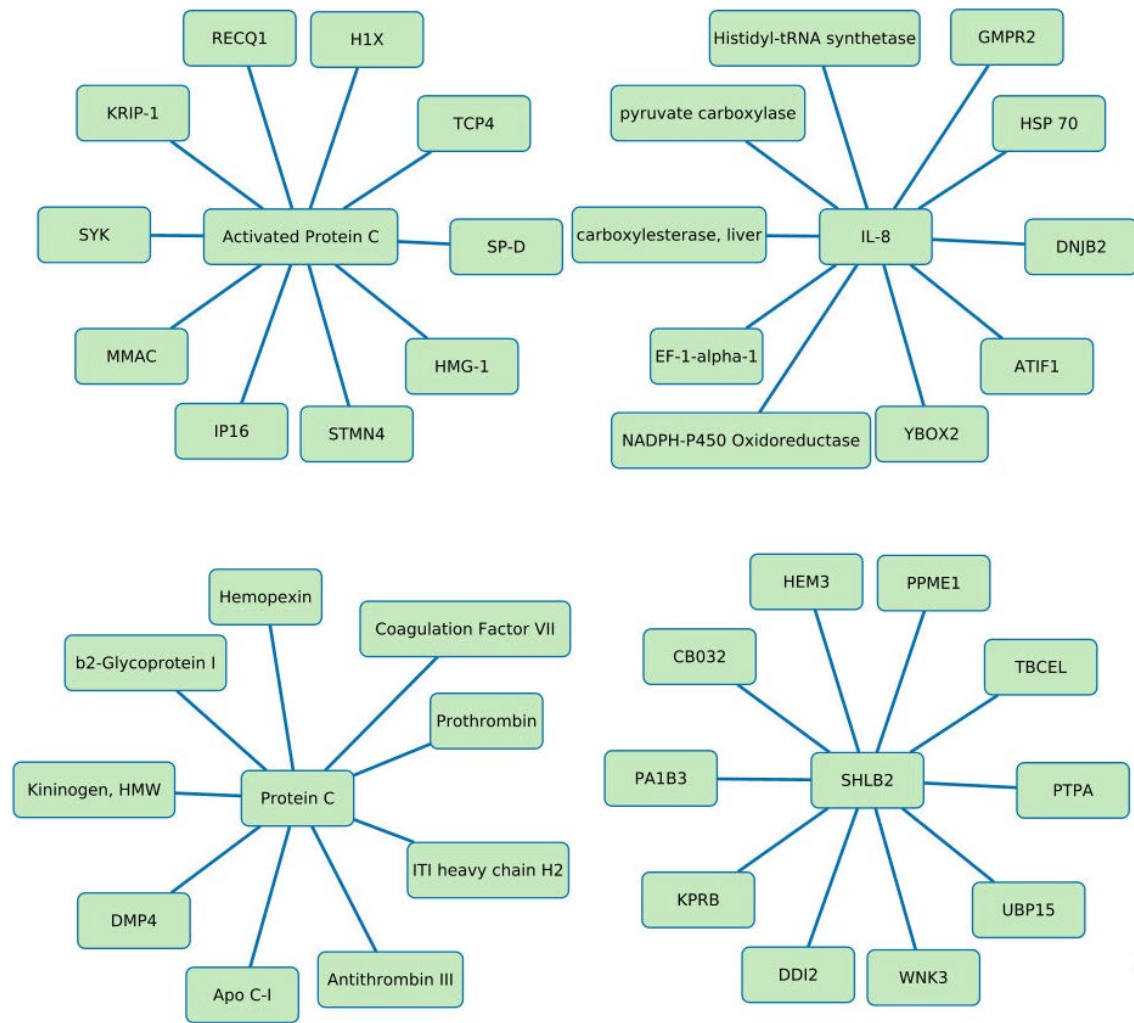

**Figure S2.** Correlation network analysis between LASSO-model selected features for predicting persistent critical illness in trauma patients (Spearman's  $r > .70$ )

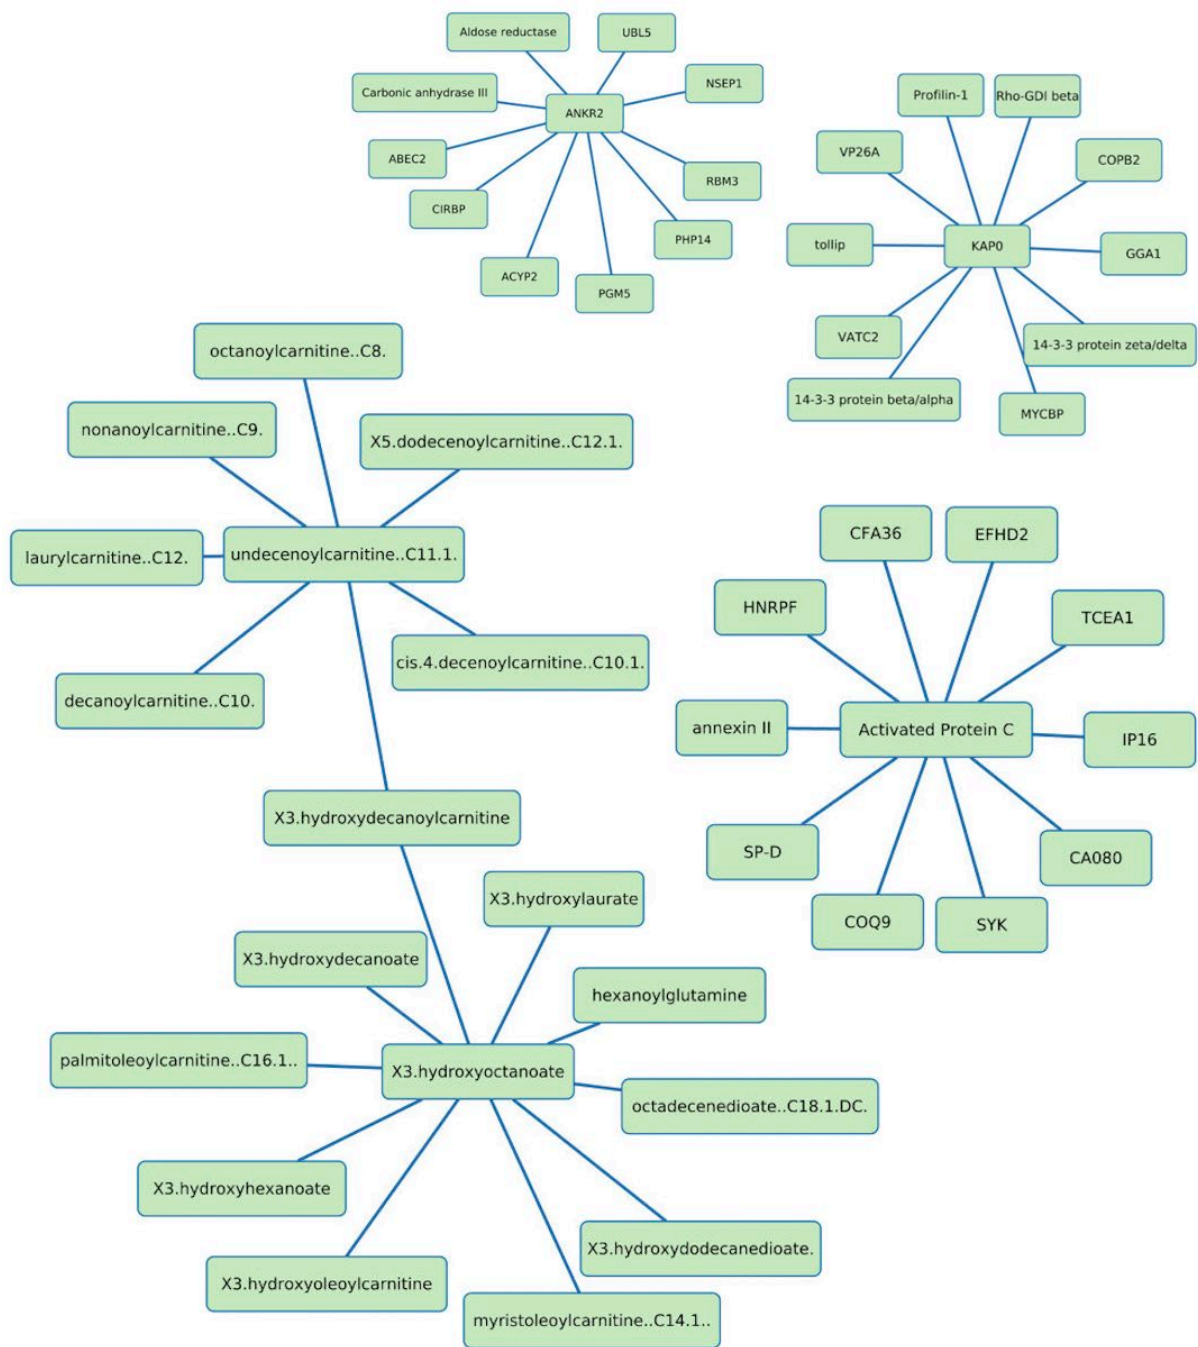

**Figure S3.** Correlation network analysis between LASSO-model selected features for predicting 30-day survival in trauma patients (Spearman's  $r > .70$ )

## Phenotype enrichment (GSEA)

### 30-day survivors

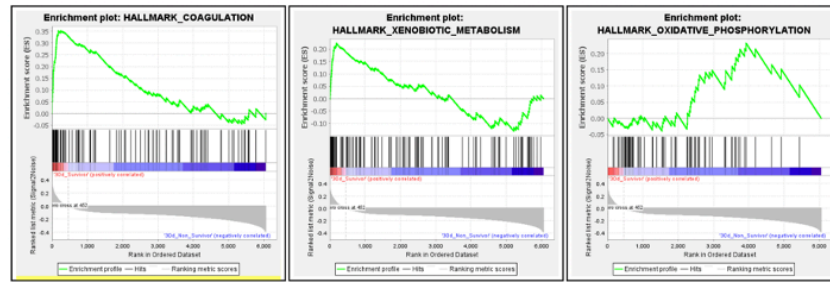

### 30-day non-survivors

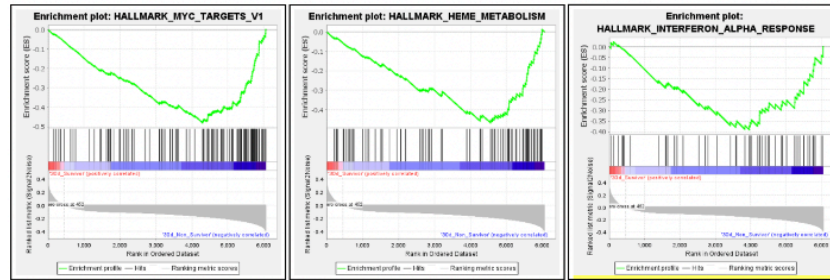

### Resolvers

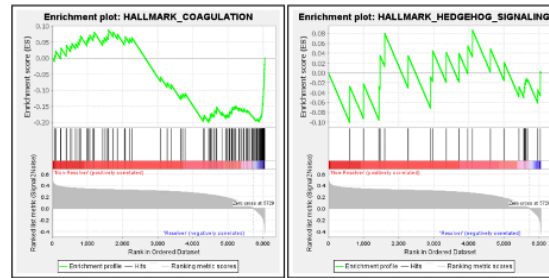

### Non-resolvers

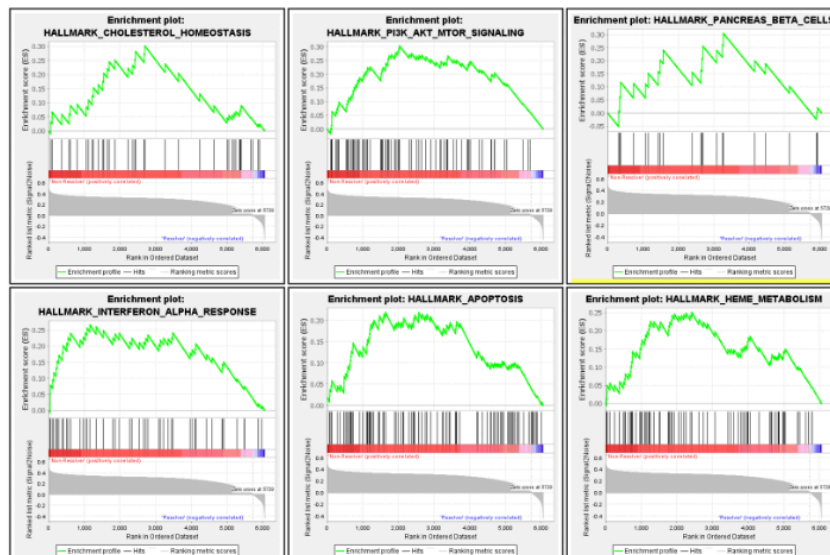

**Figure S4.** Top phenotype gene set enrichment analysis in each group (A. & B. 30-day survivors and non-survivors, C. & D. resolvers and non-resolvers). Y-axis is the enrichment score (ES) which indicates to what degree a gene set is enriched in a given group when compared to the other group. X-axis demonstrates “Rank in ordered dataset” which measures a gene’s correlation with a specific phenotype. A positive value demonstrates a correlation with the first phenotype (30-day survivors in group 1, resolvers in group 2), and a negative value demonstrates a correlation with the second phenotype (30-day non-survivors in group 1, non-resolvers in group 2).

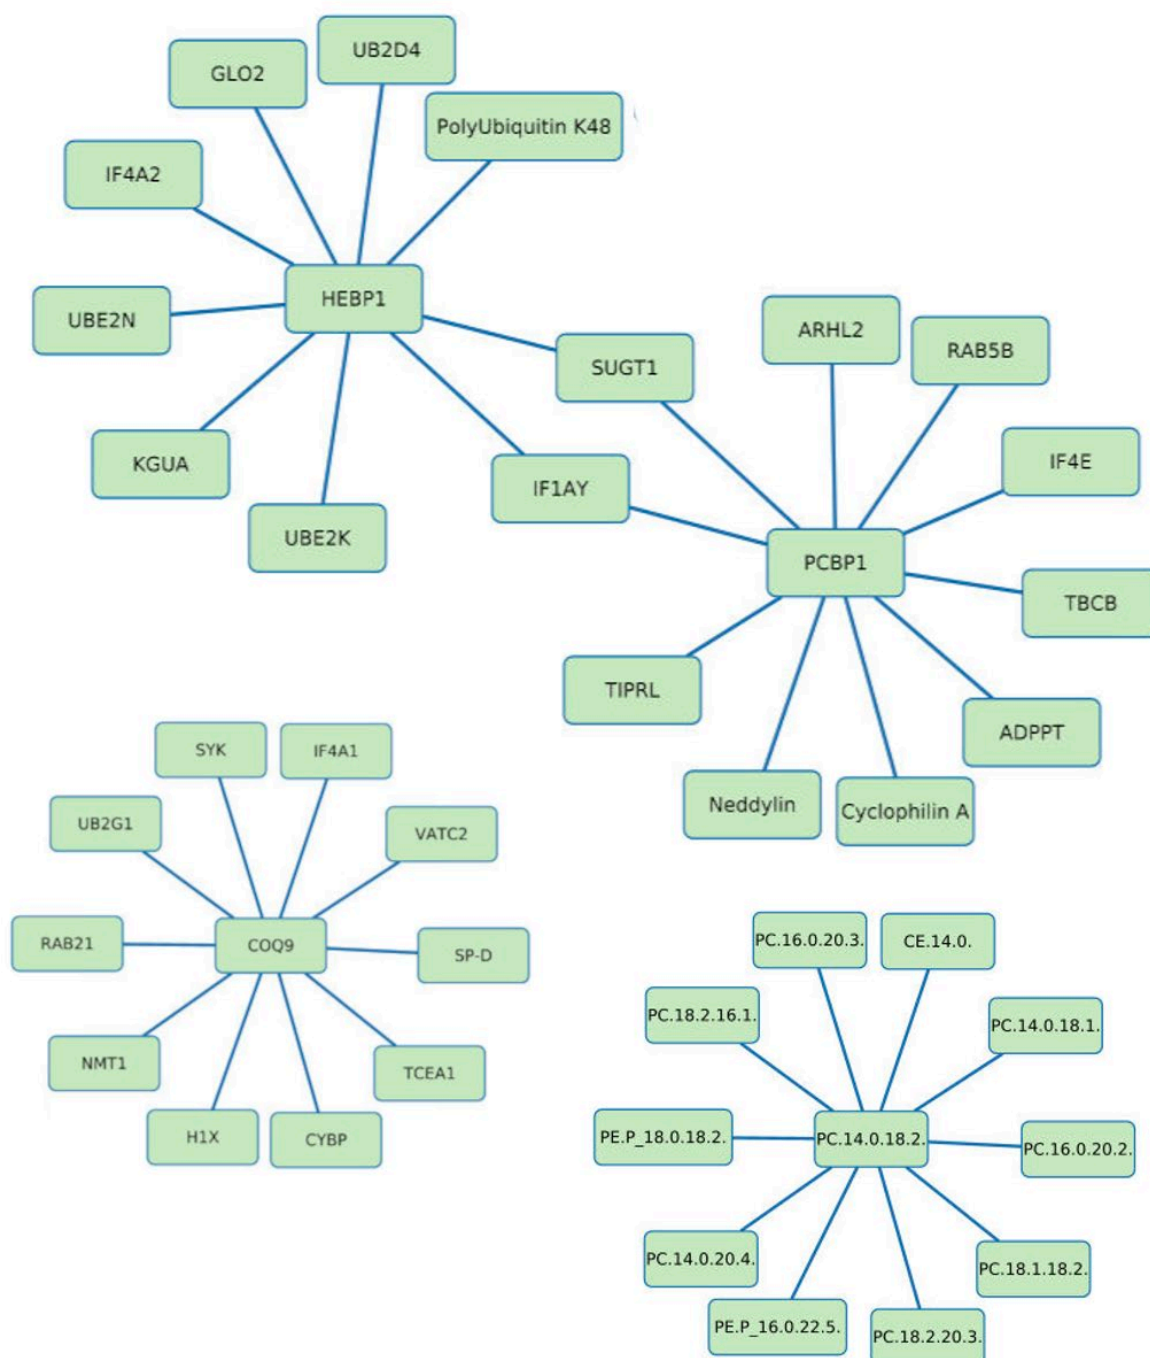

**Figure S5.** Correlation network analysis between LASSO-model selected features for predicting traumatic brain injury in trauma patients (Spearman's  $r > .70$ ).

**Table S1.** AUC's of LASSO runs done for each outcome group (4 runs each, proteomic layer, metabolomic layer, lipidomic layer, and a combined layer from the previous 3).

|                            | AUC  |
|----------------------------|------|
| <b>RESOLVING STATUS</b>    |      |
| PROTEOMIC                  | 0.74 |
| LIPIDOMICS                 | 0.62 |
| METABOLOMICS               | 0.65 |
| COMBINED                   | 0.57 |
| <b>30-DAY SURVIVAL</b>     |      |
| COMBINED                   | 0.77 |
| PROTEOMICS                 | 0.63 |
| LIPIDOMICS                 | 0.63 |
| METABOLOMICS               | 0.7  |
| <b>30-DAY SURVIVAL/TBI</b> |      |
| COMBINED                   | 0.75 |
| PROTEOMICS                 | 0.66 |
| LIPIDOMICS                 | 0.55 |
| METABOLOMICS               | 0.72 |

**Table S2.** Selected features for resolving status.

| SELECTED FEATURES FOR<br>RESOLVING STATUS | CLASS   | PATHWAY                          | PVALUE     | BH CORRECTED P-<br>VALUE |
|-------------------------------------------|---------|----------------------------------|------------|--------------------------|
| Beta-microseminoprotein                   | Protein | Immunoglobulin Binding<br>Family | 0.0000711  | 0.000284                 |
| Interleukin-8                             | Protein | Chemokine                        | 0.0000649  | 0.000284                 |
| Endophilin-B2                             | Protein | Endophilin B<br>Family           | 0.00392807 | 0.010691                 |
| Activated Protein C                       | Protein | Coagulation                      | 0.00534534 | 0.010691                 |
| Vitamin K-dependent protein C             | Protein | Coagulation                      | 0.01486754 | 0.014868                 |

**Table S3.** List of protein names for correlation networks.

| PROTEIN TARGET<br>NAME | PROTEIN FULL NAME                                                         |
|------------------------|---------------------------------------------------------------------------|
| ACTIVATED PROTEIN<br>C | Activated Protein C                                                       |
| ADPPT                  | L-aminoadipate-semialdehyde dehydrogenase-phosphopantetheinyl transferase |
| ARHL2                  | Poly(ADP-ribose) glycohydrolase ARH3                                      |
| CB032                  | CB1 cannabinoid receptor-interacting protein 1                            |
| CYCLOPHILIN A          | Peptidyl-prolyl cis-trans isomerase A                                     |
| DDI2                   | Protein DDI1 homolog 2                                                    |
| GLO2                   | Hydroxyacylglutathione hydrolase, mitochondrial                           |
| H1X                    | Histone H1x                                                               |
| HEBP1                  | Heme-binding protein 1                                                    |
| HEM3                   | Porphobilinogen deaminase                                                 |
| HMG-1                  | High mobility group protein B1                                            |
| IF1AY                  | Eukaryotic translation initiation factor 1A, Y-chromosomal                |
| IF4A2                  | Eukaryotic initiation factor 4A-II                                        |
| IF4E                   | Eukaryotic translation initiation factor 4E                               |
| IP16                   | Gamma-interferon-inducible protein 16                                     |
| KGUA                   | Guanylate kinase                                                          |
| KPRB                   | Phosphoribosyl pyrophosphate synthase-associated protein 2                |

|                   |                                                               |
|-------------------|---------------------------------------------------------------|
| KRIP-1            | Transcription intermediary factor 1-beta                      |
| MMAC              | Methylmalonic aciduria and homocystinuria type C protein      |
| NEDDYLIN          | Ubiquitin-like protein Nedd8                                  |
| PA1B3             | Platelet-activating factor acetylhydrolase IB subunit gamma   |
| PCBP1             | Poly(rC)-binding protein 1                                    |
| POLYUBIQUITIN K48 | PolyUbiquitin K48-linked                                      |
| PPME1             | Protein phosphatase methylesterase 1                          |
| PTPA              | Serine/threonine-protein phosphatase 2A regulatory subunit B' |
| RAB5B             | Ras-related protein Rab-5B                                    |
| RECQ1             | ATP-dependent DNA helicase Q1                                 |
| SHLB2             | Endophilin-B2                                                 |
| SP-D              | Pulmonary surfactant-associated protein D                     |
| STMN4             | Stathmin-4                                                    |
| SUGT1             | Protein SGT1 homolog                                          |
| SYK               | Lysine--tRNA ligase                                           |
| TBCB              | Tubulin-folding cofactor B                                    |
| TBCEL             | Tubulin-specific chaperone cofactor E-like protein            |
| TCP4              | Activated RNA polymerase II transcriptional coactivator p15   |
| TIPRL             | TIP41-like protein                                            |
| UB2D4             | Ubiquitin-conjugating enzyme E2 D4                            |
| UBE2K             | Ubiquitin-conjugating enzyme E2 K                             |
| UBE2N             | Ubiquitin-conjugating enzyme E2 N                             |
| UBP15             | Ubiquitin carboxyl-terminal hydrolase 15                      |
| WNK3              | Serine/threonine-protein kinase WNK3                          |

**Table S4.** Selected features for 30-day survival.

| SELECTED FEATURES FOR 30-DAY SURVIVAL                         | CLASS      | PATHWAY                         | P-VALUE    | BH CORRECTED P-VALUE |
|---------------------------------------------------------------|------------|---------------------------------|------------|----------------------|
| 5(6)DIHYDROTHYMINE                                            | Metabolite | Pyrimidine Metabolism           | 0.00000502 | 0.000131             |
| PREGNENEDIOL SULFATE (C21H34O5S)                              | Lipid      | Pregnenolone Steroids           | 0.000202   | 0.005055             |
| PC.14.0.20.3                                                  | Lipid      | Phosphatidylcholine             | 0.0003     | 0.007196             |
| SEDOHEPTULOSE                                                 | Metabolite | Monosaccharide                  | 0.000332   | 0.00764              |
| ACTIVATED PROTEIN C                                           | Protein    | Coagulation                     | 0.000858   | 0.01761              |
| (3)AMINO(2)PIPERIDONE                                         | Metabolite | Arginine and Proline Metabolism | 0.000847   | 0.01761              |
| XANTHINE                                                      | Metabolite | Purine Metabolism               | 0.000881   | 0.01761              |
| URIDINE                                                       | Metabolite | Pyrimidine Metabolism           | 0.001153   | 0.021916             |
| PC.14.0.18.2                                                  | Lipid      | Phosphatidylcholine             | 0.001277   | 0.022987             |
| (17)ALPHA-HYDROXYPREGNENOLONE(3)SULFATE                       | Lipid      | Pregnenolone Steroids           | 0.003274   | 0.055664             |
| N-ACETYL-ASPARTYL-GLUTAMATE (NAAG)                            | Metabolite | Peptide Neurotransmitter        | 0.003896   | 0.062342             |
| ANKYRIN REPEAT DOMAIN-CONTAINING PROTEIN 2                    | Protein    | MARP Family                     | 0.006512   | 0.09768              |
| CAMP-DEPENDENT PROTEIN KINASE TYPE I-ALPHA REGULATORY SUBUNIT | Protein    | Kinase                          | 0.012553   | 0.146847             |
| (3)HYDROXYOCTANOATE                                           | Lipid      | Fatty Acid, Monohydroxy         | 0.014685   | 0.146847             |
| LYXONATE                                                      | Metabolite | Pentose Metabolism              | 0.010516   | 0.146847             |
| MALONYLCARNITINE                                              | Lipid      | Fatty Acid Synthesis            | 0.013936   | 0.146847             |
| PREGNANEDIOL(3)GLUCURONIDE                                    | Lipid      | Progestin Steroids              | 0.012484   | 0.146847             |

|                                                               |            |                                           |          |          |
|---------------------------------------------------------------|------------|-------------------------------------------|----------|----------|
| (5)ALPHA-PREGNAN(3)BETA(20)ALPHA-DIOL-MONOSULFATE(2)          | Lipid      | Progestin Steroids                        | 0.027047 | 0.216374 |
| DELTA-TOCOPHEROL                                              | Metabolite | Tocopherol Metabolism                     | 0.026233 | 0.216374 |
| ALLO-THREONINE                                                | Metabolite | Glycine, Serine and Threonine Metabolism  | 0.088166 | 0.617164 |
| COAGULATION FACTOR VIII                                       | Protein    | Coagulation                               | 0.254972 | 0.763278 |
| RENIN                                                         | Protein    | Renin Angiotensin System                  | 0.339788 | 0.763278 |
| ADVANCED GLYCOSYLATION END PRODUCT-SPECIFIC RECEPTOR, SOLUBLE | Protein    | Cell Surface Molecule                     | 0.411155 | 0.763278 |
| BILIRUBIN DEGRADATION PRODUCT (C16H18N2O5.2)                  | Metabolite | Bilirubin Degradation                     | 0.270903 | 0.763278 |
| UNDECENOYL CARNITINE(C11.1)                                   | Metabolite | Leucine, Isoleucine and Valine Metabolism | 0.132665 | 0.763278 |
| TAG55.5 FA18(2)                                               | Lipid      | Triacylglycerol                           | 0.763278 | 0.763278 |

**Table S5.** Selected features for 30-day survival in TBI.

| SELECTED FEATURES FOR PRESENCE OF TBI                     | CLASS      | PATHWAY                                | P-VALUE   | BH CORRECTED P-VALUE |
|-----------------------------------------------------------|------------|----------------------------------------|-----------|----------------------|
| N-acetyl-aspartyl-glutamate (NAAG)                        | Metabolite | Peptide Neurotransmitter               | 0.0000178 | 0.000178             |
| Aldose reductase                                          | Protein    | NADPH-dependant Oxireductase           | 0.000021  | 0.000189             |
| Oxindolylalanine                                          | Metabolite | Tryptophan Metabolism                  | 0.0000317 | 0.000254             |
| Creatine kinase M-type:Creatine kinase B-type heterodimer | Protein    | Kinase                                 | 0.000144  | 0.00101              |
| Fatty acid-binding protein, heart                         | Protein    | Lipid-binding protein                  | 0.000919  | 0.005513             |
| N-palmitoylglycine                                        | Lipid      | Fatty Acid Metabolism (Acyl Glycine)   | 0.002224  | 0.011122             |
| 5-alpha-androstan(3)beta 17beta-diol-disulfate            | Lipid      | Androgenic Steroid                     | 0.003814  | 0.013146             |
| PI.18.0.18.2                                              | Lipid      | Phosphatidylinositol                   | 0.004382  | 0.013146             |
| Oxalate ethanedioate                                      | Metabolite | Ascorbate and Aldarate Metabolism      | 0.047038  | 0.076462             |
| Trigonelline(N)methylnicotinate                           | Metabolite | Nicotinate and Nicotinamide Metabolism | 0.076462  | 0.076462             |



**Table S6.** Ranked Gene List between 30-day survivors vs. non-survivors (GSEA). A positive value demonstrates a correlation with the first phenotype (30-day survivors in group 1, responders in group 2), and a negative value demonstrates a correlation with the second phenotype (30-day non-survivors in group 1, non-responders in group 2).

| NAME     | TITLE                                                                                             | SCORE       |
|----------|---------------------------------------------------------------------------------------------------|-------------|
| SERPINF2 | serpin family F member 2 [Source:HGNC Symbol;Acc:HGNC:9075]                                       | 0.49038604  |
| PROC     | protein C, inactivator of coagulation factors Va and VIIIa [Source:HGNC Symbol;Acc:HGNC:9451]     | 0.47138682  |
| CPB2     | carboxypeptidase B2 [Source:HGNC Symbol;Acc:HGNC:2300]                                            | 0.3814521   |
| ADAMTS13 | ADAM metallopeptidase with thrombospondin type 1 motif 13 [Source:HGNC Symbol;Acc:HGNC:1366]      | 0.35133052  |
| IGFALS   | insulin like growth factor binding protein acid labile subunit [Source:HGNC Symbol;Acc:HGNC:5468] | 0.34175417  |
| PZP      | PZP alpha-2-macroglobulin like [Source:HGNC Symbol;Acc:HGNC:9750]                                 | 0.33677304  |
| PLA2G12B | phospholipase A2 group XIIB [Source:HGNC Symbol;Acc:HGNC:18555]                                   | 0.33042234  |
| BTD      | biotinidase [Source:HGNC Symbol;Acc:HGNC:1122]                                                    | 0.3218178   |
| F9       | coagulation factor IX [Source:HGNC Symbol;Acc:HGNC:3551]                                          | 0.3175016   |
| SERPINA4 | serpin family A member 4 [Source:HGNC Symbol;Acc:HGNC:8948]                                       | 0.31455392  |
| F11      | coagulation factor XI [Source:HGNC Symbol;Acc:HGNC:3529]                                          | 0.31378555  |
| SERPIND1 | serpin family D member 1 [Source:HGNC Symbol;Acc:HGNC:4838]                                       | 0.28808224  |
| NCMAP    | non-compact myelin associated protein [Source:HGNC Symbol;Acc:HGNC:29332]                         | 0.28789428  |
| IZUMO4   | IZUMO family member 4 [Source:HGNC Symbol;Acc:HGNC:26950]                                         | 0.28626233  |
| F13A1    | coagulation factor XIII A chain [Source:HGNC Symbol;Acc:HGNC:3531]                                | 0.28528827  |
| IGFBP3   | insulin like growth factor binding protein 3 [Source:HGNC Symbol;Acc:HGNC:5472]                   | 0.28493634  |
| MAP2K4   | mitogen-activated protein kinase kinase 4 [Source:HGNC Symbol;Acc:HGNC:6844]                      | 0.28217614  |
| AZGP1    | alpha-2-glycoprotein 1, zinc-binding [Source:HGNC Symbol;Acc:HGNC:910]                            | 0.28040224  |
| RBP4     | retinol binding protein 4 [Source:HGNC Symbol;Acc:HGNC:9922]                                      | 0.27747256  |
| IL1RAP   | interleukin 1 receptor accessory protein [Source:HGNC Symbol;Acc:HGNC:5995]                       | 0.27242404  |
| F13B     | coagulation factor XIII B chain [Source:HGNC Symbol;Acc:HGNC:3534]                                | 0.27198485  |
| CAMP     | cathelicidin antimicrobial peptide [Source:HGNC Symbol;Acc:HGNC:1472]                             | 0.2719579   |
| SERPINA5 | serpin family A member 5 [Source:HGNC Symbol;Acc:HGNC:8723]                                       | 0.2696333   |
| ARF1     | ADP ribosylation factor 1 [Source:HGNC Symbol;Acc:HGNC:652]                                       | -0.38243207 |
| INPP5D   | inositol polyphosphate-5-phosphatase D [Source:HGNC Symbol;Acc:HGNC:6079]                         | -0.38251507 |
| RFK      | riboflavin kinase [Source:HGNC Symbol;Acc:HGNC:30324]                                             | -0.38626677 |
| MZB1     | marginal zone B and B1 cell specific protein [Source:HGNC Symbol;Acc:HGNC:30125]                  | -0.38899603 |
| TTC9     | tetratricopeptide repeat domain 9 [Source:HGNC Symbol;Acc:HGNC:20267]                             | -0.3910564  |
| EIF4A1   | eukaryotic translation initiation factor 4A1 [Source:HGNC Symbol;Acc:HGNC:3282]                   | -0.39504117 |
| APLP2    | amyloid beta precursor like protein 2 [Source:HGNC Symbol;Acc:HGNC:598]                           | -0.39616615 |
| GZMK     | granzyme K [Source:HGNC Symbol;Acc:HGNC:4711]                                                     | -0.39852026 |
| CPLX1    | complexin 1 [Source:HGNC Symbol;Acc:HGNC:2309]                                                    | -0.40014836 |
| CHMP1A   | charged multivesicular body protein 1A [Source:HGNC Symbol;Acc:HGNC:8740]                         | -0.4004056  |
| GPC3     | glypican 3 [Source:HGNC Symbol;Acc:HGNC:4451]                                                     | -0.40311554 |
| ISG15    | ISG15 ubiquitin like modifier [Source:HGNC Symbol;Acc:HGNC:4053]                                  | -0.4225093  |
| PCNA     | proliferating cell nuclear antigen [Source:HGNC Symbol;Acc:HGNC:8729]                             | -0.4248515  |
| SMOC1    | SPARC related modular calcium binding 1 [Source:HGNC Symbol;Acc:HGNC:20318]                       | -0.4275326  |
| SLIT2    | slit guidance ligand 2 [Source:HGNC Symbol;Acc:HGNC:11086]                                        | -0.4275852  |
| A2M      | alpha-2-macroglobulin [Source:HGNC Symbol;Acc:HGNC:7]                                             | -0.43045333 |
| CPLX2    | complexin 2 [Source:HGNC Symbol;Acc:HGNC:2310]                                                    | -0.45341763 |
| SMOC2    | SPARC related modular calcium binding 2 [Source:HGNC Symbol;Acc:HGNC:20323]                       | -0.4623694  |

**Table S7.** Ranked gene list between resolvers and non-resolvers (GSEA).

| NAME     | TITLE                                                                                            | SCORE       |
|----------|--------------------------------------------------------------------------------------------------|-------------|
| CXCL8    | C-X-C motif chemokine ligand 8 [Source:HGNC Symbol;Acc:HGNC:6025]                                | 0.6299099   |
| MSMB     | microseminoprotein beta [Source:HGNC Symbol;Acc:HGNC:7372]                                       | 0.60551965  |
| ALDH3A1  | aldehyde dehydrogenase 3 family member A1 [Source:HGNC Symbol;Acc:HGNC:405]                      | 0.59096164  |
| PPT1     | palmitoyl-protein thioesterase 1 [Source:HGNC Symbol;Acc:HGNC:9325]                              | 0.5423089   |
| GALNT14  | polypeptide N-acetylgalactosaminyltransferase 14 [Source:HGNC Symbol;Acc:HGNC:22946]             | 0.5222981   |
| S100A6   | S100 calcium binding protein A6 [Source:HGNC Symbol;Acc:HGNC:10496]                              | 0.49666965  |
| TMOD1    | tropomodulin 1 [Source:HGNC Symbol;Acc:HGNC:11871]                                               | 0.48645607  |
| CD274    | CD274 molecule [Source:HGNC Symbol;Acc:HGNC:17635]                                               | 0.48033306  |
| EPS8L1   | EPS8 like 1 [Source:HGNC Symbol;Acc:HGNC:21295]                                                  | 0.48004276  |
| GDI1     | GDP dissociation inhibitor 1 [Source:HGNC Symbol;Acc:HGNC:4226]                                  | 0.4796571   |
| RILP     | Rab interacting lysosomal protein [Source:HGNC Symbol;Acc:HGNC:30266]                            | 0.47823128  |
| VSIG2    | V-set and immunoglobulin domain containing 2 [Source:HGNC Symbol;Acc:HGNC:17149]                 | 0.47804528  |
| CSF3     | colony stimulating factor 3 [Source:HGNC Symbol;Acc:HGNC:2438]                                   | 0.47603843  |
| DHRS11   | dehydrogenase/reductase 11 [Source:HGNC Symbol;Acc:HGNC:28639]                                   | 0.4708104   |
| PA2G4    | proliferation-associated 2G4 [Source:HGNC Symbol;Acc:HGNC:8550]                                  | 0.46906778  |
| CXCL13   | C-X-C motif chemokine ligand 13 [Source:HGNC Symbol;Acc:HGNC:10639]                              | 0.46861416  |
| ACP6     | acid phosphatase 6, lysophosphatidic [Source:HGNC Symbol;Acc:HGNC:29609]                         | 0.46555108  |
| FCGR2B   | Fc fragment of IgG receptor IIb [Source:HGNC Symbol;Acc:HGNC:3618]                               | 0.46078134  |
| DNAJB4   | DnaJ heat shock protein family (Hsp40) member B4 [Source:HGNC Symbol;Acc:HGNC:14886]             | 0.4603548   |
| EEF2KMT  | eukaryotic elongation factor 2 lysine methyltransferase [Source:HGNC Symbol;Acc:HGNC:32221]      | 0.4583485   |
| JUP      | junction plakoglobin [Source:HGNC Symbol;Acc:HGNC:6207]                                          | 0.45665398  |
| AMPH     | amphiphysin [Source:HGNC Symbol;Acc:HGNC:471]                                                    | 0.454679    |
| KRT17    | keratin 17 [Source:HGNC Symbol;Acc:HGNC:6427]                                                    | 0.44462767  |
| EIF4EBP3 | eukaryotic translation initiation factor 4E binding protein 3 [Source:HGNC Symbol;Acc:HGNC:3290] | 0.44448102  |
| F9       | coagulation factor IX [Source:HGNC Symbol;Acc:HGNC:3551]                                         | -0.23622549 |
| CFHR5    | complement factor H related 5 [Source:HGNC Symbol;Acc:HGNC:24668]                                | -0.23656416 |
| TMEM70   | transmembrane protein 70 [Source:HGNC Symbol;Acc:HGNC:26050]                                     | -0.23668264 |
| PLG      | plasminogen [Source:HGNC Symbol;Acc:HGNC:9071]                                                   | -0.2384552  |
| IL20RB   | interleukin 20 receptor subunit beta [Source:HGNC Symbol;Acc:HGNC:6004]                          | -0.24539113 |
| FGL1     | fibrinogen like 1 [Source:HGNC Symbol;Acc:HGNC:3695]                                             | -0.25183696 |
| BTD      | biotinidase [Source:HGNC Symbol;Acc:HGNC:1122]                                                   | -0.25381142 |
| SERPINC1 | serpin family C member 1 [Source:HGNC Symbol;Acc:HGNC:775]                                       | -0.25408944 |
| ITIH2    | inter-alpha-trypsin inhibitor heavy chain 2 [Source:HGNC Symbol;Acc:HGNC:6167]                   | -0.2556512  |
| F7       | coagulation factor VII [Source:HGNC Symbol;Acc:HGNC:3544]                                        | -0.26221678 |
| AGT      | angiotensinogen [Source:HGNC Symbol;Acc:HGNC:333]                                                | -0.27318233 |
| GC       | GC vitamin D binding protein [Source:HGNC Symbol;Acc:HGNC:4187]                                  | -0.2844821  |
| IZUMO4   | IZUMO family member 4 [Source:HGNC Symbol;Acc:HGNC:26950]                                        | -0.32439372 |
| CPB2     | carboxypeptidase B2 [Source:HGNC Symbol;Acc:HGNC:2300]                                           | -0.33378258 |
| HP       | haptoglobin [Source:HGNC Symbol;Acc:HGNC:5141]                                                   | -0.33667478 |
| SERPINF2 | serpin family F member 2 [Source:HGNC Symbol;Acc:HGNC:9075]                                      | -0.34237707 |
| IL1RAP   | interleukin 1 receptor accessory protein [Source:HGNC Symbol;Acc:HGNC:5995]                      | -0.34765673 |
| PZP      | PZP alpha-2-macroglobulin like [Source:HGNC Symbol;Acc:HGNC:9750]                                | -0.399206   |
| PROC     | protein C, inactivator of coagulation factors Va and VIIIa [Source:HGNC Symbol;Acc:HGNC:9451]    | -0.4422778  |

**Table S8.** Ranked Gene List between TBI vs. NBI patients (GSEA).

| NAME    | TITLE                                                                                                            | SCORE       |
|---------|------------------------------------------------------------------------------------------------------------------|-------------|
| ALDH1A2 | aldehyde dehydrogenase 1 family member A2 [Source:HGNC Symbol;Acc:HGNC:15472]                                    | 0.57157636  |
| CPLX2   | complexin 2 [Source:HGNC Symbol;Acc:HGNC:2310]                                                                   | 0.48933095  |
| CRABP2  | cellular retinoic acid binding protein 2 [Source:HGNC Symbol;Acc:HGNC:2339]                                      | 0.46159774  |
| HPGDS   | hematopoietic prostaglandin D synthase [Source:HGNC Symbol;Acc:HGNC:17890]                                       | 0.44475207  |
| ELAVL2  | ELAV like RNA binding protein 2 [Source:HGNC Symbol;Acc:HGNC:3313]                                               | 0.43242094  |
| AKR1B1  | aldo-keto reductase family 1 member B [Source:HGNC Symbol;Acc:HGNC:381]                                          | 0.41787526  |
| GALNT14 | polypeptide N-acetylgalactosaminyltransferase 14 [Source:HGNC Symbol;Acc:HGNC:22946]                             | 0.41758662  |
| MAG     | myelin associated glycoprotein [Source:HGNC Symbol;Acc:HGNC:6783]                                                | 0.40778923  |
| NOVA1   | NOVA alternative splicing regulator 1 [Source:HGNC Symbol;Acc:HGNC:7886]                                         | 0.40716144  |
| NPTXR   | neuronal pentraxin receptor [Source:HGNC Symbol;Acc:HGNC:7954]                                                   | 0.40158445  |
| ASB9    | ankyrin repeat and SOCS box containing 9 [Source:HGNC Symbol;Acc:HGNC:17184]                                     | 0.3999002   |
| KLK7    | kallikrein related peptidase 7 [Source:HGNC Symbol;Acc:HGNC:6368]                                                | 0.39699575  |
| MSMB    | microseminoprotein beta [Source:HGNC Symbol;Acc:HGNC:7372]                                                       | 0.39032647  |
| USP14   | ubiquitin specific peptidase 14 [Source:HGNC Symbol;Acc:HGNC:12612]                                              | 0.389617    |
| CRHBP   | corticotropin releasing hormone binding protein [Source:HGNC Symbol;Acc:HGNC:2356]                               | 0.38663018  |
| AGER    | advanced glycosylation end-product specific receptor [Source:HGNC Symbol;Acc:HGNC:320]                           | 0.38479918  |
| CBR3    | carbonyl reductase 3 [Source:HGNC Symbol;Acc:HGNC:1549]                                                          | 0.38003492  |
| CNRIP1  | cannabinoid receptor interacting protein 1 [Source:HGNC Symbol;Acc:HGNC:24546]                                   | 0.374988    |
| NCAN    | neurocan [Source:HGNC Symbol;Acc:HGNC:2465]                                                                      | 0.37451422  |
| EHD2    | EH domain containing 2 [Source:HGNC Symbol;Acc:HGNC:3243]                                                        | 0.37395182  |
| ATP1B1  | ATPase Na <sup>+</sup> /K <sup>+</sup> transporting subunit beta 1 [Source:HGNC Symbol;Acc:HGNC:804]             | 0.3709674   |
| PLCD1   | phospholipase C delta 1 [Source:HGNC Symbol;Acc:HGNC:9060]                                                       | 0.3699091   |
| YWHAG   | tyrosine 3-monooxygenase/tryptophan 5-monooxygenase activation protein gamma [Source:HGNC Symbol;Acc:HGNC:12852] | 0.36614332  |
| HMBS    | hydroxymethylbilane synthase [Source:HGNC Symbol;Acc:HGNC:4982]                                                  | 0.3659617   |
| PHPT1   | phosphohistidine phosphatase 1 [Source:HGNC Symbol;Acc:HGNC:30033]                                               | 0.36336586  |
| ITGA2B  | integrin subunit alpha 2b [Source:HGNC Symbol;Acc:HGNC:6138]                                                     | -0.17555647 |
| GRIK2   | glutamate ionotropic receptor kainate type subunit 2 [Source:HGNC Symbol;Acc:HGNC:4580]                          | -0.18448848 |
| ACTN1   | actinin alpha 1 [Source:HGNC Symbol;Acc:HGNC:163]                                                                | -0.19070216 |
| COQ6    | coenzyme Q6, monooxygenase [Source:HGNC Symbol;Acc:HGNC:20233]                                                   | -0.20896854 |
| MMP19   | matrix metalloproteinase 19 [Source:HGNC Symbol;Acc:HGNC:7165]                                                   | -0.21055807 |
| TDGF1   | teratocarcinoma-derived growth factor 1 [Source:HGNC Symbol;Acc:HGNC:11701]                                      | -0.21163894 |
| CHGA    | chromogranin A [Source:HGNC Symbol;Acc:HGNC:1929]                                                                | -0.21710454 |
| ATP1B4  | ATPase Na <sup>+</sup> /K <sup>+</sup> transporting family member beta 4 [Source:HGNC Symbol;Acc:HGNC:808]       | -0.23038776 |
| FGL1    | fibrinogen like 1 [Source:HGNC Symbol;Acc:HGNC:3695]                                                             | -0.27049166 |
